# Supplementary material for: Perinatal risk factors for the onset of bipolar disorder in young adulthood: a 22-year birth cohort
Source: PubMed Central journal article supplement — Braz J Psychiatry. 2024 Jun 21;46:e20233338. doi: 10.47626/1516-4446-2023-3338 (PMC11427987; doi:10.47626/1516-4446-2023-3338), 2024-06-21
Supplement: bjp-46-e20233338-suppl1.pdf [file bjp-46-e20233338-suppl1.pdf]

**Figure S1** Frequency of missing values for each feature in the dataset

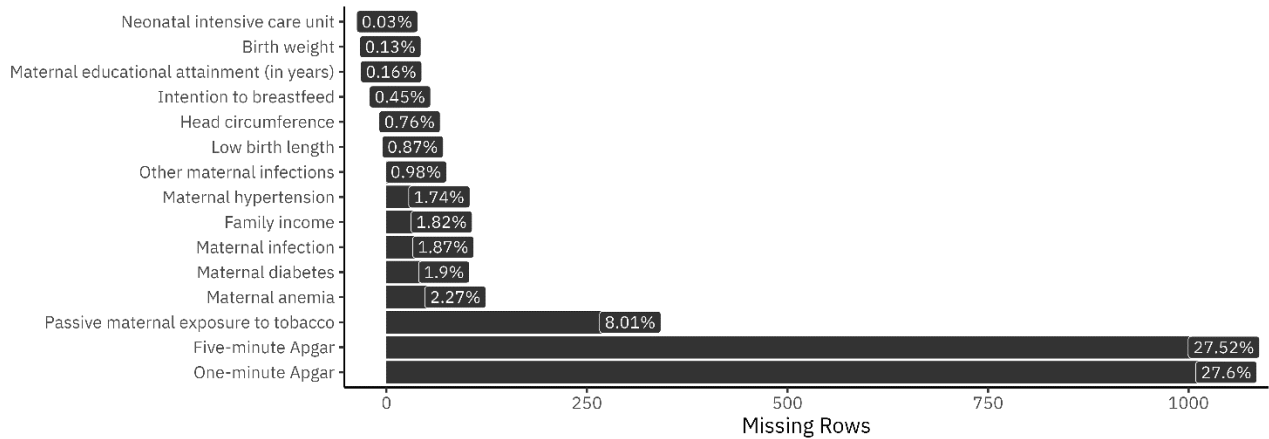

Only variables with one or more missing values are displayed. The x-axis shows the absolute number of missing values per variable, while the label shows the relative frequency (percentage) of missing values per variable.

**Figure S2** Relative frequencies of (a) maternal smoking during pregnancy, (b) maternal exposure to tobacco during pregnancy, and (c) lifetime smoking at age 15 according to the onset of bipolar disorder in young adulthood in the cohort sample

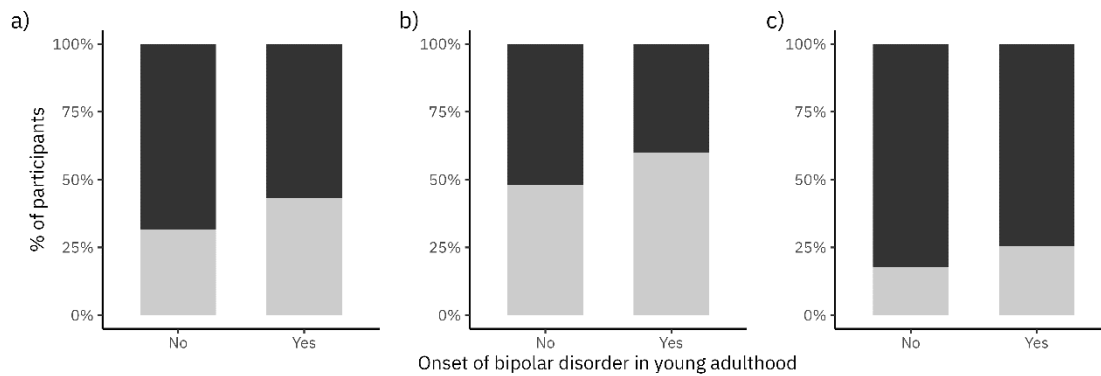

**Table S1** Perinatal data stratified according to the onset of bipolar disorder in young adulthood (n=3,794)

| Variables                      | Individuals without BD (n=3,526) | Onset of BD in young adulthood (n=268) | p-value |
|--------------------------------|----------------------------------|----------------------------------------|---------|
| Cesarean section               |                                  |                                        | 0.082   |
| No                             | 2,415 (68.5%)                    | 198 (73.9%)                            |         |
| Yes                            | 1,111 (31.5%)                    | 70 (26.1%)                             |         |
| Induced labor                  |                                  |                                        | 0.584   |
| No                             | 2,411 (68.4%)                    | 188 (70.1%)                            |         |
| Yes                            | 1,115 (31.6%)                    | 80 (29.9%)                             |         |
| Neonatal ICU                   |                                  |                                        | 0.286   |
| No                             | 3,446 (97.7%)                    | 259 (96.6%)                            |         |
| Yes                            | 79 (2.2%)                        | 9 (3.4%)                               |         |
| Missing                        | 1 (0.0%)                         | 0 (0%)                                 |         |
| Maternal arterial hypertension |                                  |                                        | 0.423   |
| No                             | 2,928 (83.0%)                    | 224 (83.6%)                            |         |
| Treated                        | 409 (11.6%)                      | 24 (9.0%)                              |         |
| Untreated                      | 135 (3.8%)                       | 8 (3.0%)                               |         |
| Missing                        | 54 (1.5%)                        | 12 (4.5%)                              |         |
| Maternal diabetes mellitus     |                                  |                                        | 0.873   |
| No                             | 3,373 (95.7%)                    | 247 (92.2%)                            |         |
| Treated                        | 76 (2.2%)                        | 6 (2.2%)                               |         |
| Untreated                      | 18 (0.5%)                        | 2 (0.7%)                               |         |
| Missing                        | 59 (1.7%)                        | 13 (4.9%)                              |         |
| Gestational infection          |                                  |                                        | 0.372   |
| No                             | 3,139 (89.0%)                    | 226 (84.3%)                            |         |
| Treated                        | 316 (9.0%)                       | 28 (10.4%)                             |         |
| Untreated                      | 43 (1.2%)                        | 5 (1.9%)                               |         |
| Missing                        | 28 (0.8%)                        | 9 (3.4%)                               |         |
| Gestational anemia             |                                  |                                        | 0.237   |
| No                             | 1,868 (53.0%)                    | 123 (45.9%)                            |         |
| Treated                        | 1,502 (42.6%)                    | 123 (45.9%)                            |         |
| Untreated                      | 85 (2.4%)                        | 7 (2.6%)                               |         |
| Missing                        | 71 (2.0%)                        | 15 (5.6%)                              |         |
| Intrapartum hemorrhage         |                                  |                                        | 0.506   |
| No                             | 3,493 (99.1%)                    | 264 (98.5%)                            |         |
| Yes                            | 33 (0.9%)                        | 4 (1.5%)                               |         |
| Maternal smoking               |                                  |                                        | <0.001  |
| No                             | 2,410 (68.3%)                    | 152 (56.7%)                            |         |
| Yes                            | 1,116 (31.7%)                    | 116 (43.3%)                            |         |

| Variables                                  | Individuals without BD (n=3,526) | Onset of BD in young adulthood (n=268) | p-value |
|--------------------------------------------|----------------------------------|----------------------------------------|---------|
| Passive maternal exposure to tobacco       |                                  |                                        | <0.001  |
| No                                         | 1,688 (47.9%)                    | 99 (36.9%)                             |         |
| Yes                                        | 1,554 (44.1%)                    | 149 (55.6%)                            |         |
| Missing                                    | 284 (8.1%)                       | 20 (7.5%)                              |         |
| Heavy drinking during pregnancy            |                                  |                                        | 0.774   |
| No                                         | 3,490 (99.0%)                    | 266 (99.3%)                            |         |
| Yes                                        | 36 (1.0%)                        | 2 (0.7%)                               |         |
| Parental structure                         |                                  |                                        | 0.195   |
| No                                         | 417 (11.8%)                      | 39 (14.6%)                             |         |
| Yes                                        | 3,109 (88.2%)                    | 229 (85.4%)                            |         |
| Low birth weight                           |                                  |                                        | 0.107   |
| No                                         | 3,215 (91.2%)                    | 237 (88.4%)                            |         |
| Yes                                        | 306 (8.7%)                       | 31 (11.6%)                             |         |
| Missing                                    | 5 (0.1%)                         | 0 (0%)                                 |         |
| Low birth length                           |                                  |                                        | 0.074   |
| No                                         | 2,992 (84.9%)                    | 216 (80.6%)                            |         |
| Yes                                        | 504 (14.3%)                      | 49 (18.3%)                             |         |
| Missing                                    | 30 (0.9%)                        | 3 (1.1%)                               |         |
| Head circumference < 33 cm                 |                                  |                                        | 0.373   |
| No                                         | 3,191 (90.5%)                    | 240 (89.6%)                            |         |
| Yes                                        | 306 (8.7%)                       | 28 (10.4%)                             |         |
| Missing                                    | 29 (0.8%)                        | 0 (0%)                                 |         |
| Paternal educational attainment (in years) |                                  |                                        | < 0.001 |
| Mean (SD)                                  | 6.98 (3.54)                      | 6.00 (3.21)                            |         |
| Median (Min, Max)                          | 6.00 (0, 19.0)                   | 5.00 (0, 16.0)                         |         |
| Missing                                    | 242 (6.9%)                       | 18 (6.7%)                              |         |
| Maternal educational attainment (in years) |                                  |                                        | < 0.001 |
| Mean (SD)                                  | 6.93 (3.60)                      | 5.82 (2.92)                            |         |
| Median (Min, Max)                          | 6.00 (0, 23.0)                   | 5.00 (0, 16.0)                         |         |
| Missing                                    | 6 (0.2%)                         | 0 (0%)                                 |         |
| Family support                             |                                  |                                        | 0.676   |
| No                                         | 350 (9.9%)                       | 29 (10.8%)                             |         |
| Yes                                        | 3,176 (90.1%)                    | 239 (89.2%)                            |         |
| Intention to breastfeed                    |                                  |                                        | 0.391   |
| No                                         | 21 (0.6%)                        | 0 (0%)                                 |         |
| Yes                                        | 3,488 (98.9%)                    | 268 (100%)                             |         |
| Missing                                    | 17 (0.5%)                        | 0 (0%)                                 |         |

| <b>Variables</b>                    | <b>Individuals without BD (n=3,526)</b> | <b>Onset of BD in young adulthood (n=268)</b> | <b>p-value</b> |
|-------------------------------------|-----------------------------------------|-----------------------------------------------|----------------|
| One-minute Apgar < 7                |                                         |                                               | 0.399          |
| No                                  | 2,360 (66.9%)                           | 175 (65.3%)                                   |                |
| Yes                                 | 201 (5.7%)                              | 11 (4.1%)                                     |                |
| Missing                             | 965 (27.4%)                             | 82 (30.6%)                                    |                |
| Five-minute Apgar < 7               |                                         |                                               | 0.234          |
| No                                  | 2,535 (71.9%)                           | 187 (69.8%)                                   |                |
| Yes                                 | 28 (0.8%)                               | 0 (0%)                                        |                |
| Missing                             | 963 (27.3%)                             | 81 (30.2%)                                    |                |
| Respiratory dysfunction             |                                         |                                               | 0.114          |
| No                                  | 3,458 (98.1%)                           | 259 (96.6%)                                   |                |
| Yes                                 | 68 (1.9%)                               | 9 (3.4%)                                      |                |
| Trauma during labor                 |                                         |                                               | 0.229          |
| No                                  | 3,523 (99.9%)                           | 267 (99.6%)                                   |                |
| Yes                                 | 3 (0.1%)                                | 1 (0.4%)                                      |                |
| Malformations                       |                                         |                                               | 1              |
| No                                  | 3,523 (99.9%)                           | 268 (100%)                                    |                |
| Yes                                 | 3 (0.1%)                                | 0 (0%)                                        |                |
| Fetal distress                      |                                         |                                               | 0.416          |
| No                                  | 3,511 (99.6%)                           | 268 (100%)                                    |                |
| Yes                                 | 15 (0.4%)                               | 0 (0%)                                        |                |
| Maternal age at delivery < 20 years |                                         |                                               | 0.162          |
| No                                  | 2,926 (83.0%)                           | 213 (79.5%)                                   |                |
| Yes                                 | 600 (17.0%)                             | 55 (20.5%)                                    |                |
| Maternal age at delivery > 34 years |                                         |                                               | 0.277          |
| No                                  | 3,132 (88.8%)                           | 244 (91.0%)                                   |                |
| Yes                                 | 394 (11.2%)                             | 24 (9.0%)                                     |                |

BD = bipolar disorder; ICU = intensive care unit.

P-values were calculated using Student's t-test and chi-square test.
